# Supplementary material
Source: publisher figshare collection journal article supplement (https://acs.figshare.com/ndownloader/files/20101871)
Supplement: Supplementary file 1 [file 20101871]

## Supplemental Information

### **Selenocysteine Substitution into a Class I Ribonucleotide Reductase**

*Brandon L. Greene<sup>†\*</sup>, JoAnne Stubbe<sup>‡§</sup>, and Daniel G. Nocera<sup>#</sup>*

<sup>†</sup>Department of Chemistry and Biochemistry, University of California Santa Barbara, Santa Barbara CA 93106

<sup>‡</sup>Department of Chemistry and <sup>§</sup>Department of Biology, Massachusetts Institute of Technology, Cambridge MA 20139

<sup>#</sup>Department of Chemistry and Chemical Biology, Harvard University, Cambridge MA 02138

\*Email: [green@chem.ucsb.edu](mailto:green@chem.ucsb.edu)

## Table of Contents

|                                                                                                                         |     |
|-------------------------------------------------------------------------------------------------------------------------|-----|
| <b>Figure S1.</b> SDS-PAGE of C <sub>439</sub> U and C <sub>225</sub> U expression in ME6 cells                         | S3  |
| <b>Figure S2.</b> SDS-PAGE of C <sub>439</sub> U purification                                                           | S4  |
| <b>Table S1.</b> Selenium quantitation in C <sub>439</sub> U, C <sub>225</sub> U, and wt $\alpha_2$                     | S5  |
| <b>Table S2.</b> Steady state and single turnover activity of C <sub>439</sub> U, C <sub>225</sub> U, and wt $\alpha_2$ | S6  |
| <b>Figure S3.</b> HPLC standards for cytosine, cytidine, and deoxycytidine                                              | S7  |
| <b>Figure S4.</b> X-band EPR spectrum of N <sub>3</sub> CDP reacted C <sub>439</sub> U                                  | S8  |
| <b>Figure S5.</b> Short timescale SF UV-vis kinetics at 460 nm                                                          | S9  |
| <b>Figure S6.</b> Long timescale SF UV-vis kinetics at 460 nm                                                           | S10 |
| <b>Figure S7.</b> SF controls with wt and C <sub>439</sub> U $\alpha_2$                                                 | S11 |
| <b>Table S3.</b> SF kinetic fitting parameters                                                                          | S12 |
| <b>Figure S8.</b> Mechanism of RNR inhibition by 2'-F/Cl substituted NDPs                                               | S13 |
| <b>Figure S9.</b> X-band EPR spectrum C <sub>225</sub> U $\alpha_2$ reaction with CDP/ $\beta_2$                        | S14 |
| <b>Figure S10.</b> Mechanism of RNR inhibition by N <sub>3</sub> NDP                                                    | S15 |

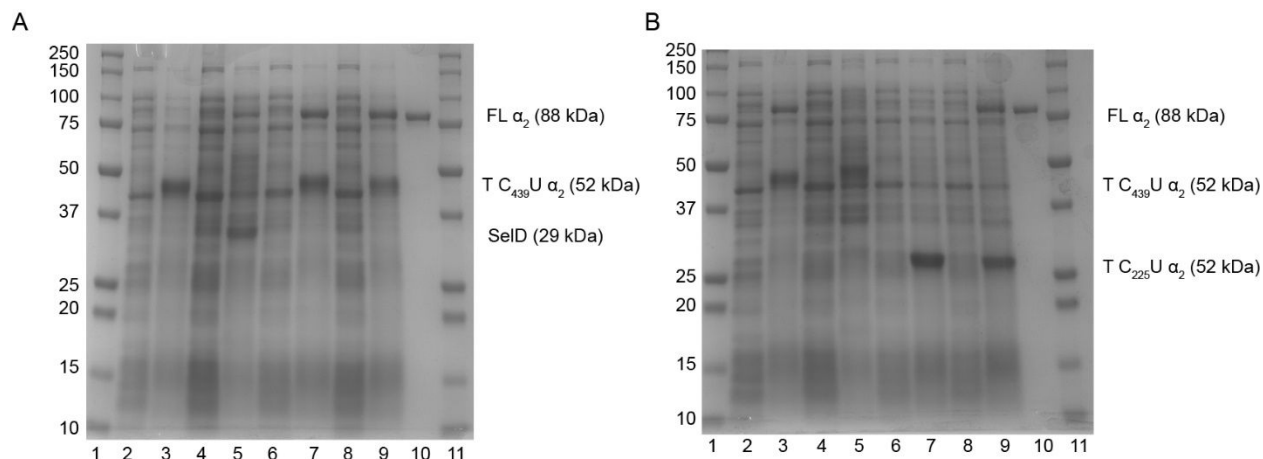

**Figure S1.** SDS-PAGE analysis of IPTG/arabinose dependence of  $C_{439}U$  and  $C_{225}U$  expression in ME6 cells. General conditions as follows; 10 mL culture inoculated with a single colony from freshly prepared plates, 100  $\mu\text{g/mL}$  ampicillin, 50  $\mu\text{g/mL}$  kanamycin, 30  $\mu\text{M}$   $\text{Na}_2\text{SeO}_3$  in LB media. Arabinose (ara) added at  $\text{OD}_{600} = 0.5$ , IPTG added at  $\text{OD}_{600} = 0.8$ . Cells grown at 37  $^\circ\text{C}$  shaking at 200 rpm until  $\text{OD} = 0.5$  reached, then temperature dropped to 30  $^\circ\text{C}$  and grown for an additional 20 h. Pre- and post-induction cell samples were collected at  $\text{OD} = 0.5$  and  $\text{OD} = 4-6$  respectively. **A**  $C_{439}U$  expression as a function of induction conditions. *Lane 1*, molecular weight marker; *lane 2*,  $C_{439}U$  0.2 mM IPTG/0% (w/v) ara pre-induction; *lane 3*,  $C_{439}U$  0.2 mM IPTG/0% ara post-induction; *lane 4*,  $C_{439}U$  0 mM IPTG/0.1% ara pre-induction; *lane 5*,  $C_{439}U$  0 mM IPTG/0.1% ara post-induction; *lane 6*,  $C_{439}U$  0.2 mM IPTG/0.1% ara pre-induction; *lane 7*,  $C_{439}U$  0.2 mM IPTG/0.1% ara post-induction; *lane 8*,  $C_{439}U$  0.2 mM IPTG/0.2% ara pre-induction; *lane 9*,  $C_{439}U$  0.2 mM IPTG/0.2% ara post-induction; *lane 10*, authentic wt  $\alpha_2$  standard; *lane 11*, molecular weight marker. FL = full length; T = truncated. **B** *Lane 1*, molecular weight marker; *lane 2*,  $C_{439}U$  0.4 mM IPTG/0.2% ara pre-induction; *lane 3*,  $C_{439}U$  0.4 mM IPTG/0.2% ara post-induction; *lane 4*,  $C_{439}U$  0 mM IPTG/0 % ara pre-induction; *lane 5*,  $C_{439}U$  0 mM IPTG/0% ara post-induction; *lane 6*,  $C_{225}U$  0.2 mM IPTG/0% ara pre-induction; *lane 7*,  $C_{225}U$  0.2 mM IPTG/0% ara post-induction; *lane 8*,  $C_{225}U$  0.2 mM IPTG/0.1% ara pre-induction; *lane 9*,  $C_{225}U$  0.2 mM IPTG/0.1% ara post-induction; *lane 10*, authentic wt  $\alpha_2$  standard; *lane 11*, molecular weight marker.

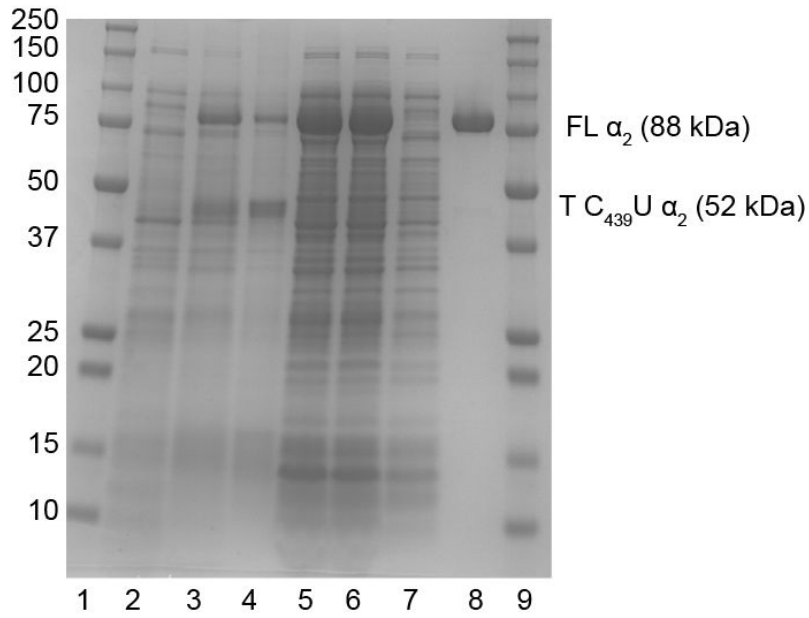

**Figure S2.** SDS-PAGE analysis of C<sub>439</sub>U purification. *Lane 1*, molecular weight marker; *lane 2*, pre-induction ME6 cells; *lane 3*, 20 h post-induction ME6 cells; *lane 4*, cell lysate debris; *lane 5*, cell lysate supernatant; *lane 6*, DNA precipitation supernatant; *lane 7*, Ni-NTA column flow-through at 50 mM imidazole; *lane 8*, eluted C<sub>439</sub>U  $\alpha_2$  (250 mM imidazole); *lane 9* molecular weight marker. FL = full length; T = truncated.

**Table S1.** Selenium quantitation in C<sub>439</sub>U, C<sub>225</sub>U, wt, and C<sub>439</sub>S  $\alpha_2$  under various expression conditions.

| Protein            | Expression Conditions                                                         | Yield (mg/g) | [Se]/[ $\alpha$ ] |
|--------------------|-------------------------------------------------------------------------------|--------------|-------------------|
| C <sub>439</sub> U | 100 $\mu$ M Na <sub>2</sub> SeO <sub>3</sub><br>0.1% Arabinose<br>1 mM IPTG   | 9            | 0.54 (0.06)       |
| C <sub>439</sub> U | 100 $\mu$ M Na <sub>2</sub> SeO <sub>3</sub><br>0.1% Arabinose<br>0.5 mM IPTG | 4            | 0.70 (0.06)       |
| C <sub>439</sub> U | 30 $\mu$ M Na <sub>2</sub> SeO <sub>3</sub><br>0.1% Arabinose<br>0.25 mM IPTG | 1-2          | 1.0 (0.1)*        |
| C <sub>225</sub> U | 30 $\mu$ M Na <sub>2</sub> SeO <sub>3</sub><br>0.1% Arabinose<br>0.25 mM IPTG | 0.5          | 0.82 (0.07)       |
| wt                 | 30 $\mu$ M Na <sub>2</sub> SeO <sub>3</sub><br>0.1% Arabinose<br>0.25 mM IPTG | 3.5          | 0.006 (0.002)     |
| C <sub>439</sub> S | 30 $\mu$ M Na <sub>2</sub> SeO <sub>3</sub><br>0.1% Arabinose<br>0.25 mM IPTG | 3.0          | 0.002 (0.003)     |

\* Three independent preparations under these conditions have been analyzed and the error in [Se]/[ $\alpha$ ] is significantly larger among triplicate samples of a single protein preparation (+/- 9%) than among the averages of the three preparations (+/- 2%).

**Table S2.** Steady state and single turnover activity of wt, C<sub>439</sub>X, and C<sub>225</sub>X proteins (X = S, U).

| Protein                                                     | Steady State (units) | Single Turnover |
|-------------------------------------------------------------|----------------------|-----------------|
| wt                                                          | 1920 (30)            | 1.6 (0.2)       |
| C <sub>439</sub> S                                          | 20 (20)              | 0.02 (0.02)     |
| C <sub>439</sub> U                                          | 30 (20)              | 0.02 (0.01)     |
| C <sub>225</sub> U                                          | 30 (20)              | 0.04 (0.04)     |
| WT<br>(-O <sub>2</sub> , +200 $\mu$ M DTT)                  | 1900 (40)            | 11 (3)          |
| C <sub>439</sub> U<br>(-O <sub>2</sub> , +200 $\mu$ M DTT)  | n.d.                 | 0.24 (0.03)     |
| C <sub>225</sub> U<br>(-O <sub>2</sub> , + 200 $\mu$ M DTT) | n.d.                 | 7.9 (0.9)       |

n.d., not determined

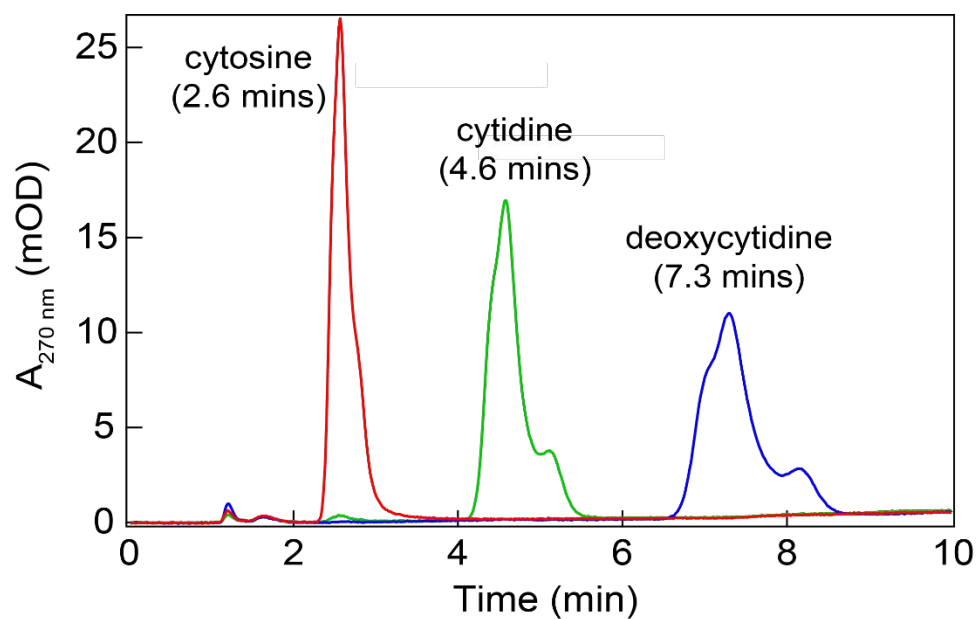

**Figure S3.** Individual HPLC standards for cytosine (red), cytidine (green), deoxycytidine (blue). Standards were prepared at 50  $\mu\text{M}$  in 5 mM  $\text{KP}_i$  pH = 6.8. Elution gradient is identical to that reported in the materials and methods.

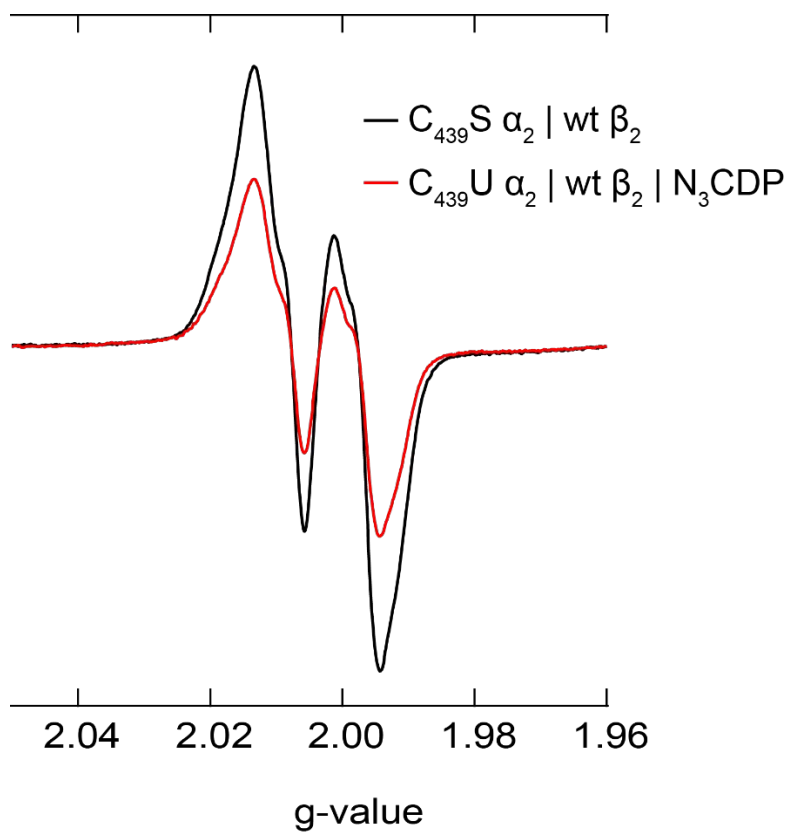

**Figure S4.** X-band EPR spectra of 50  $\mu M$  wt  $\beta_2$  with 50  $\mu M$   $C_{439}S \alpha_2$ , 1 mM CDP and 3 mM ATP (black) and 50  $\mu M$   $C_{439}U \alpha_2$ , 0.2 mM  $N_3CDP$  and 3 mM ATP (red). Spectra recorded at 80 K with 1 Gauss modulation amplitude, 100 kHz modulation frequency, and 20  $\mu W$  microwave power.



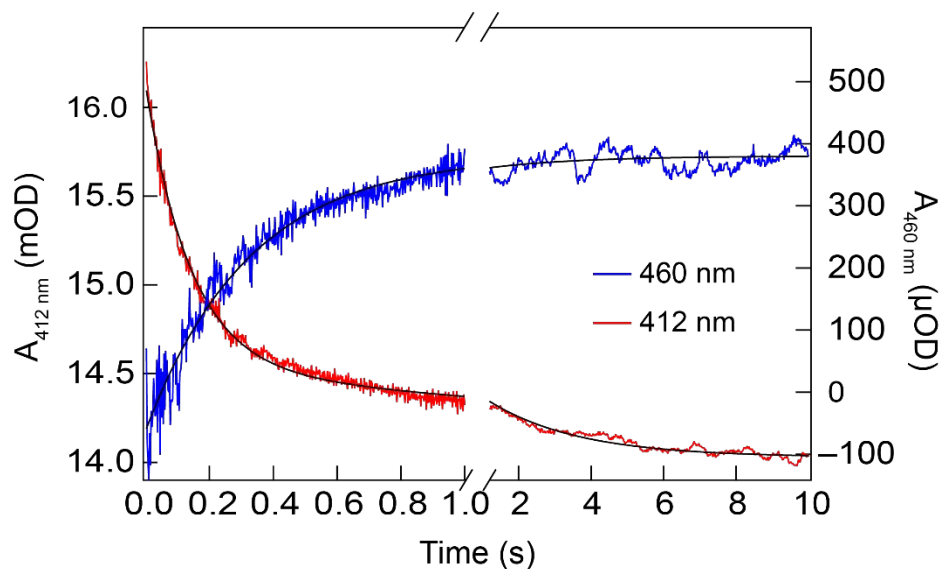

**Figure S5.** Stopped-flow UV-vis kinetic traces 412 nm (red, as reported in the main text), 460 nm (blue) and associated bi- and monoexponential fits respectively (black). Sample conditions identical to those of Figure 4 of the main text. The 460 nm transient was equally well fit by mono- or biexponential, likely due to the lower signal to noise, and thus the monoexponential fit is reported. The  $k_{\text{obs}} = 3.19 (0.05) \text{ s}^{-1}$  appears intermediate between the two observed rate constants for the fast ( $\sim 7 \text{ s}^{-1}$ ) and slow ( $0.4 \text{ s}^{-1}$ ) phases for both 340 nm and 412 nm.

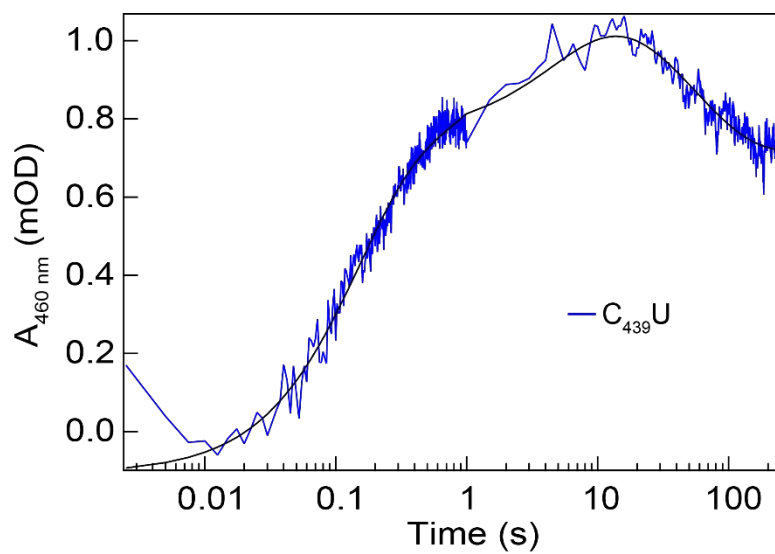

**Figure S6.** Long timescale stopped-flow kinetics for C<sub>439</sub>U (blue)  $\alpha_2$  mixing with wt  $\beta_2$  to a final concentration of 20  $\mu$ M  $\alpha_2\beta_2$ , 1 mM CDP and 3 mM ATP in assay buffer monitored at 460 nm.

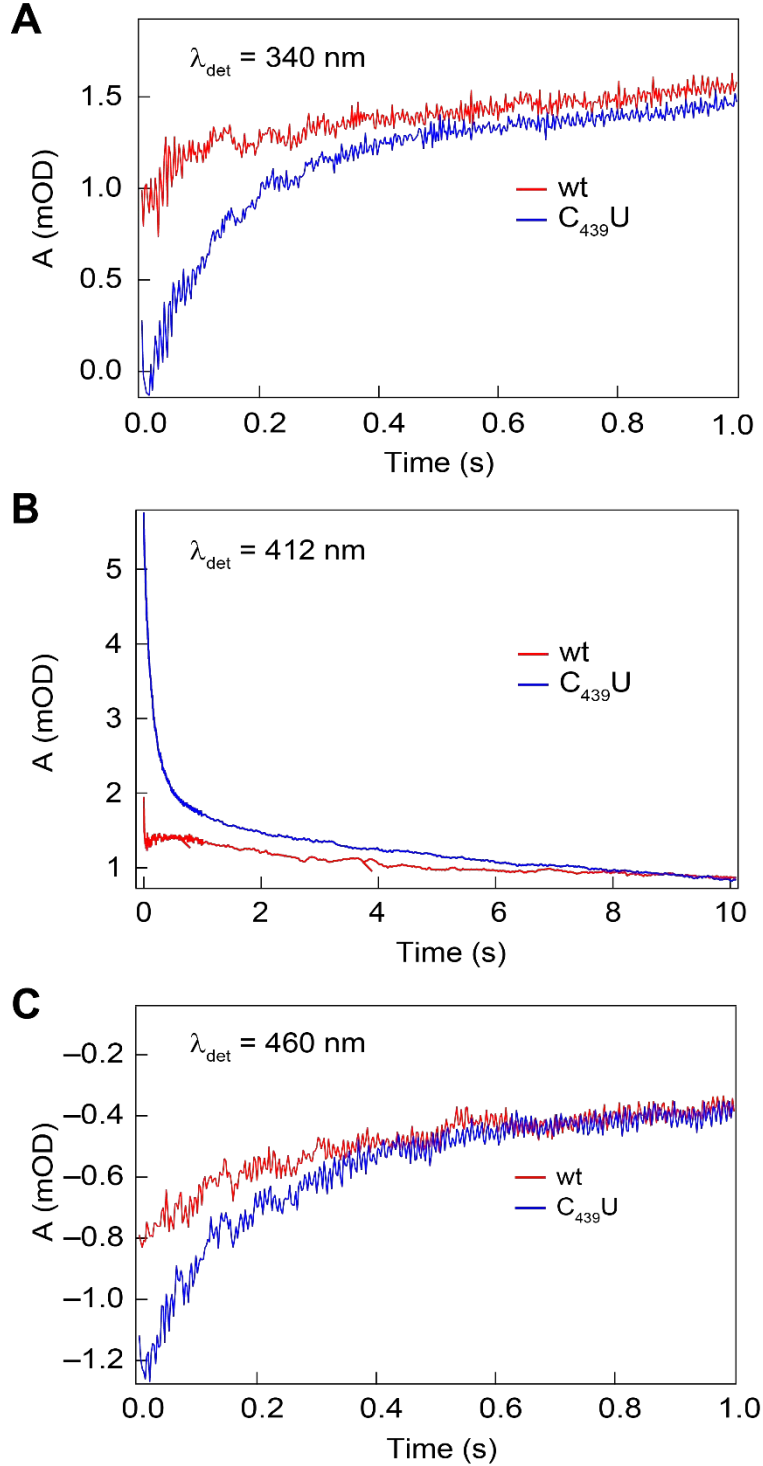

**Figure S7.** Stopped-flow kinetic comparison between wt (red) and  $C_{439}U$  (blue)  $\alpha_2$  mixing with wt  $\beta_2$  to a final concentration of  $20 \mu\text{M}$   $\alpha_2\beta_2$ , 1 mM CDP and 3 mM ATP in assay buffer. Transients recorded at **A** 340 nm, **B** 412 nm, and **C** 460 nm. The kinetics of induced absorption (**A** and **C**) and decay (**B**) were again described well by a biexponential function with statistically identical kinetics to those reported at  $10 \mu\text{M}$   $\alpha_2\beta_2$ .

**Table S3.** Fitting parameters for SF UV-vis experiments.

| $\alpha$      | $\lambda / \text{nm}$ | $A_1 / \mu\text{OD}$ | $k_1 / \text{s}^{-1}$ | $A_2 / \mu\text{OD}$ | $k_2 / \text{s}^{-1}$ | $A_3 / \mu\text{OD}$ | $k_3 / \text{s}^{-1}$ |
|---------------|-----------------------|----------------------|-----------------------|----------------------|-----------------------|----------------------|-----------------------|
| $C_{439}U^\#$ | 340                   | 570 (20)             | 6.5 (0.3)             | 360 (20)             | 0.42 (0.03)           |                      |                       |
|               | 410                   | -1,580 (20)          | 7.1 (0.1)             | -400 (40)            | 0.40 (0.01)           |                      |                       |
|               | 460                   | 440 (10)             | 3.19 (0.05)           |                      |                       |                      |                       |
| $C_{439}U^*$  | 460                   | 770 (10)             | 7.1 (0.2)             | 490 (20)             | 0.44 (0.04)           | -430 (20)            | 0.044 (0.01)          |
| WT*           | 340                   | 520 (10)             | 2.9 (0.2)             |                      |                       |                      |                       |
|               | 412                   |                      |                       | -670 (10)            | 0.29 (0.01)           |                      |                       |
|               | 460                   | 400 (10)             | 3.2 (0.1)             |                      |                       |                      |                       |

<sup>#</sup> Experiments performed at 10  $\mu\text{M}$  final concentration.

\* Experiments performed at 20  $\mu\text{M}$  final concentration.

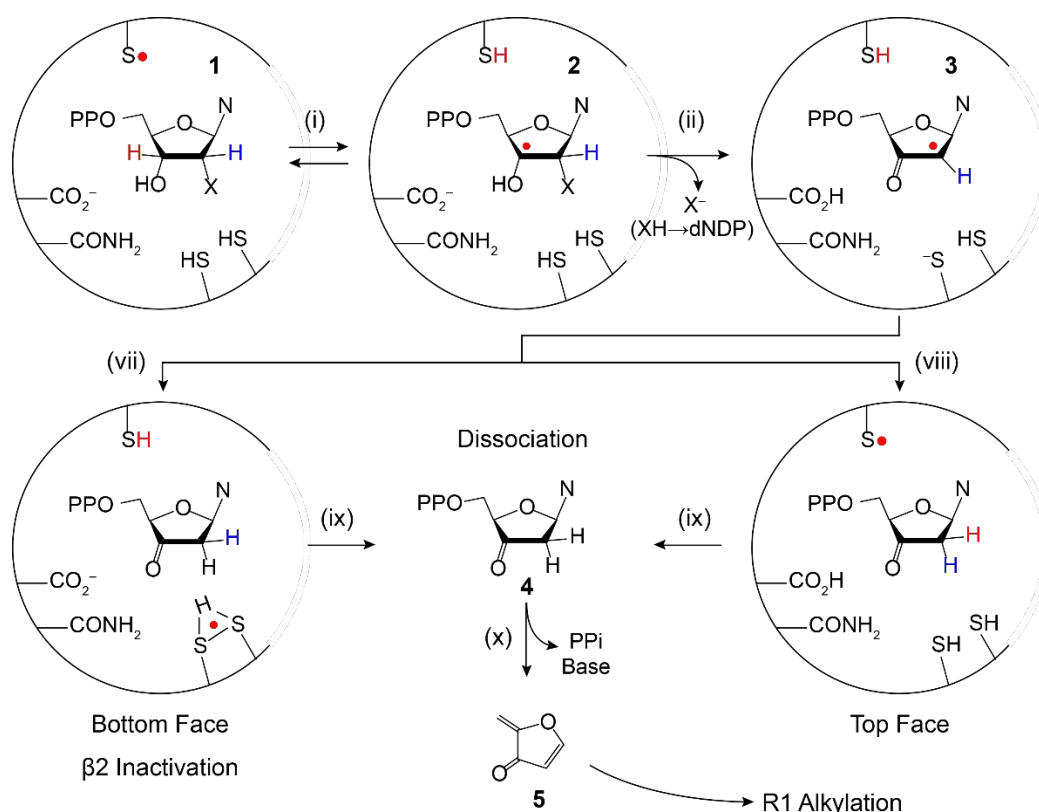

**Figure S8.** Mechanism of inactivation of RNR by mechanism-based inhibitors 2'-deoxy-2'-X NDP (X = F or Cl). The mechanism of inactivation depend on the nature of substrate radical reduction (steps vii vs. viii). During radical substrate reduction from the top face,  $\alpha_2$  is inactivated through alkylation of the essential sulfhydryl groups by **5**, but the thiyl, and thus the essential  $Y_{122}^\bullet$  in  $\beta$ , are maintained. Conversely, reduction by the bottom face inactivates both  $\alpha_2$  and  $\beta_2$  by trapping on the bottom face.

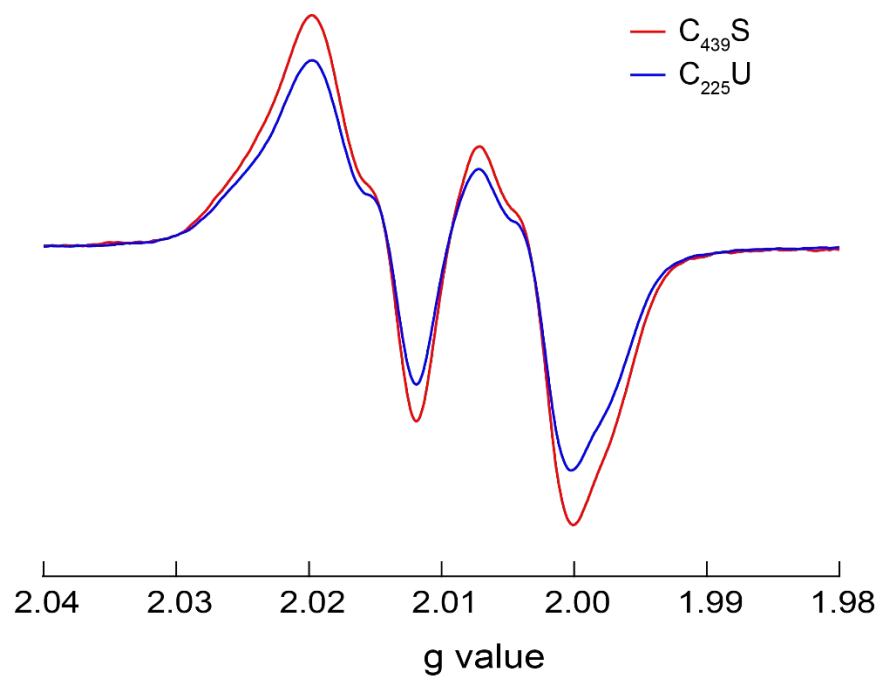

**Figure S9.** X-band EPR spectrum of 50  $\mu\text{M}$  wt  $\beta_2$  quenched at 10 s after mixing with 1 mM CDP, 3 mM ATP, and  $\text{C}_{225}\text{U}$  (blue) or  $\text{C}_{439}\text{S}$  (red)  $\alpha_2$ . Spectra recorded at 80 K with 1 Gauss modulation amplitude, 100 kHz modulation frequency, and 20  $\mu\text{W}$  microwave power.

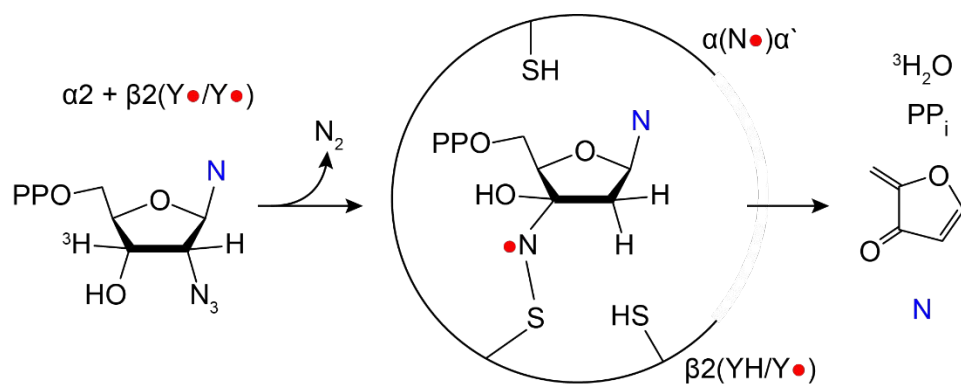

**Figure S10.** Mechanism of RNR inhibition by  $N_3NDP$ .
